# Supplementary material
Source: bioRxiv or medRxiv preprint supplement (http://medrxiv.stage.highwire.org/highwire/filestream/92316/field_highwire_adjunct_files/0/2020.08.05.20168963-1.pdf)
Supplement: Supplementary file [file 2020.08.05.20168963-1.pdf]

|                               |           |
|-------------------------------|-----------|
| <b>Patients</b>               | <b>57</b> |
| <b>Age</b>                    |           |
| Mean age                      | 58        |
| Median age                    | 59        |
| Age range                     | 4-93      |
| <b>Sex</b>                    |           |
| Male                          | 30        |
| Female                        | 27        |
| <b>Race</b>                   |           |
| White                         | 20        |
| Black                         | 22        |
| Asian                         | 3         |
| Other                         | 7         |
| Unknown                       | 5         |
| <b>Noted Symptoms</b>         |           |
| Unknown                       | 4         |
| Fevers                        | 38        |
| Myalgia                       | 17        |
| Dyspnea                       | 22        |
| Cough                         | 31        |
| Gastrointestinal              | 16        |
| <b>Noted sick contacts</b>    | <b>24</b> |
| <b>Noted Risk Factors</b>     |           |
| Active smoker                 | 5         |
| Former smoker                 | 11        |
| Immunocompromised             | 30        |
| Asthma                        | 8         |
| Obese                         | 21        |
| Alcohol abuse                 | 1         |
| <b>Coexisting conditions</b>  |           |
| 2+                            | 45        |
| 1                             | 4         |
| 0                             | 4         |
| Unkown                        | 4         |
| <b>Severity of disease</b>    |           |
| Deceased                      | 1         |
| ICU or mechanical ventilation | 12        |
| Hospitalized without need for | 26        |
| ICU level care                |           |
| Outpatient                    | 14        |
| unknown                       | 4         |
| CXR abnormalities             | 29        |

Supplementary Table 1. Study patient population.
